# Supplementary material for: Spatial transcriptomics links hepatocyte-macrophage interactions to viral signatures in seronegative hepatitis
Source: Research Square preprint supplement (doi:10.21203/rs.3.rs-7971511/v1), 2025-11-11
Supplement: Supplementary file 1 [file 07f898d0eb2948e2c34f6085.xlsx]

## Sheet: Sheet1
Sample_type	Status	Locus	Class	Family	Category	Chrom	Start	End	Strand	TE_CODING	IntersectedGene	IntersectedGeneType	IntersectedOrientation	IntersectedGeneID	TE_type	TE_5UTR_Intersect	TE_3UTR_Intersect	ClosestUpstream_gn	ClosestUpstream_id	DistUpstream	ClosestDownstream_gn	ClosestDownstream_id	DistDownstream	FANTOM_enhancer	FANTOM_CAGE
SN	downregulated	HERVS71_7q33	HERV	HERVS71	prototype	chr7	134548479	134557896	+	noncoding	AKR1B15	protein_coding	SENSE	ENSG00000227471	EXONIC	TRUE	FALSE	NA	NA	NA	NA	NA	NA	None	chr7:134548937-134548950,chr7:134549088-134549119
SN	upregulated	L1FLI_3p12.2	L1	L1	L1FLI	chr3	81050377	81058427	-	coding	LINC02027	lncRNA	ANTISENSE	ENSG00000243694	INTRONIC	NA	NA	NA	NA	NA	NA	NA	NA	None	None
SN	upregulated	HML1_1q32.1	HERV	HML1	oneside	chr1	205857564	205862572	+	noncoding	AC119673.3	lncRNA	SENSE	ENSG00000286619	EXONIC	FALSE	FALSE	NA	NA	NA	NA	NA	NA	None	chr1:205857988-205857995,chr1:205858040-205858046
SN	upregulated	HERVW_1q32.1	HERV	HERVW	oneside	chr1	205866332	205871494	-	noncoding	AC119673.3	lncRNA	ANTISENSE	ENSG00000286619	EXONIC	FALSE	FALSE	NA	NA	NA	NA	NA	NA	None	None
SN	upregulated	HERVH_1q32.1a	HERV	HERVH	oneside	chr1	205871746	205875092	+	noncoding	AC119673.3	lncRNA	SENSE	ENSG00000286619	INTRONIC	NA	NA	NA	NA	NA	NA	NA	NA	None	None
SN	upregulated	HERVH_1q32.1b	HERV	HERVH	prototype	chr1	205884573	205890424	-	noncoding	AC119673.3	lncRNA	ANTISENSE	ENSG00000286619	EXONIC	FALSE	FALSE	NA	NA	NA	NA	NA	NA	None	None
SN	upregulated	HERVK14C_1q32.1	HERV	HERVK14C	internal	chr1	205862751	205864227	+	noncoding	AC119673.3	lncRNA	SENSE	ENSG00000286619	EXONIC	FALSE	FALSE	NA	NA	NA	NA	NA	NA	None	None
SN	upregulated	HML3_1q32.1b	HERV	HML3	prototype	chr1	205890691	205896160	+	noncoding	AC119673.3	lncRNA	SENSE	ENSG00000286619	EXONIC	FALSE	FALSE	NA	NA	NA	NA	NA	NA	None	None
SN	downregulated	L1FLnI_4q22.3c	L1	L1	L1FLnI	chr4	94835260	94845285	-	coding	BMPR1B	protein_coding	ANTISENSE	ENSG00000138696	INTRONIC	NA	NA	NA	NA	NA	NA	NA	NA	None	Non
AIH	downregulated	MER4B_19_KI270938v1_alt(b)	HERV	MER4B	internal	chr19_KI270938v1_alt	600705	603313	+	noncoding	None	NA	NA	None	INTERGENIC	NA	NA	NA	NA	NA	NA	NA	NA	None	None
AIH	downregulated	L1FLnI_11q12.3k	L1	L1	L1FLnI	chr11	63309502	63319625	+	noncoding	SLC22A10	protein_coding	SENSE	ENSG00000184999	EXONIC	FALSE	TRUE	NA	NA	NA	NA	NA	NA	None	None
AIH	upregulated	HML1_1q32.1	HERV	HML1	oneside	chr1	205857564	205862572	+	noncoding	AC119673.3	lncRNA	SENSE	ENSG00000286619	EXONIC	FALSE	FALSE	NA	NA	NA	NA	NA	NA	None	chr1:205857988-205857995,chr1:205858040-205858046
AIH	upregulated	HERVW_1q32.1	HERV	HERVW	oneside	chr1	205866332	205871494	-	noncoding	AC119673.3	lncRNA	ANTISENSE	ENSG00000286619	EXONIC	FALSE	FALSE	NA	NA	NA	NA	NA	NA	None	None
AIH	upregulated	HERVK14C_1q32.1	HERV	HERVK14C	internal	chr1	205862751	205864227	+	noncoding	AC119673.3	lncRNA	SENSE	ENSG00000286619	EXONIC	FALSE	FALSE	NA	NA	NA	NA	NA	NA	None	None
AIH	upregulated	HERVH_1q32.1b	HERV	HERVH	prototype	chr1	205884573	205890424	-	noncoding	AC119673.3	lncRNA	ANTISENSE	ENSG00000286619	EXONIC	FALSE	FALSE	NA	NA	NA	NA	NA	NA	None	None
AIH	upregulated	HML3_1q32.1b	HERV	HML3	prototype	chr1	205890691	205896160	+	noncoding	AC119673.3	lncRNA	SENSE	ENSG00000286619	EXONIC	FALSE	FALSE	NA	NA	NA	NA	NA	NA	None	None
AIH	downregulated	HML3_6p22.1	HERV	HML3	prototype	chr6	29875650	29881829	-	noncoding	AL645929.3	transcribed_unprocessed_pseudogene	SENSE	ENSG00000285799	INTRONIC	NA	NA	NA	NA	NANA	NA	NA	None	None
AIH	upregulated	L1FLnI_4p13f	L1	L1	L1FLnI	chr4	42695802	42705936	-	coding	None	NA	NA	None	INTERGENIC	NA	NA	AC096734.1	ENSG00000251517	171	AC096734.2	ENSG00000260519	37874	None	None
AIH	upregulated	L1FLnI_6q14.2a	L1	L1	L1FLnI	chr6	83286659	83296777	-	coding	ME1	protein_coding	SENSE	ENSG00000065833	INTRONIC	NA	NA	NA	NA	NA	NA	NA	NA	None	None
AIH	upregulated	L1FLnI_6q14.2b	L1	L1	L1FLnI	chr6	83317361	83327404	+	noncoding	ME1	protein_coding	ANTISENSE	ENSG00000065833	INTRONIC	NA	NA	NA	NA	NA	NA	NA	NA	None	None
AIH	upregulated	L1FLnI_8q13.1f	L1	L1	L1FLnI	chr8	65992353	66002421	-	noncoding	None	NA	NA	None	INTERGENIC	NA	NA	DNAJC5B	ENSG00000147570	19132	AC100812.1	ENSG00000272192	149022	None	None
AIH	downregulated	MER61_3q28	HERV	MER61	prototype	chr3	190549018	190554482	-	noncoding	IL1RAP	protein_coding	ANTISENSE	ENSG00000196083	EXONIC	TRUE	FALSE	NA	NA	NA	NA	NA	NA	None	None
