# Supplementary material for: Spatial transcriptomics links hepatocyte-macrophage interactions to viral signatures in seronegative hepatitis
Source: Research Square preprint supplement (doi:10.21203/rs.3.rs-7971511/v1), 2025-11-11
Supplement: Supplementary file 2 [file 62b2d70d92fc8d9094f97d57.xlsx]

## Sheet: Sheet1
	Antibody	Isotype	Clone	Company	Cat #	Titation
	CD63	Mouse IgG1		abcam	ab1318
	MMP12	Rabbit IgG		abcam	ab137444
	SPP	Rabbit IgG		Protientech	20416-1-AP
	ISG15	Rabbit IgG		Protientech	15981-1-AP	1:200
	OAS2	Rabbit IgG		Protientech	19279-1-AP	1:800
	MX1	Rabbit IgG		Protientech	13750-1-AP	1:200
	ASGR1	Rabbit IgG		Protientech	11739-1-AP
	E-Cadherin	Rat IgG1	DECMA-1	Protientech	65241-1-1g
	CD68	Mouse IgG1	KP1	Invitrogen	14-0688-82
	HERV			amsbio	HERM-1811-5
	LIGHT	Rabbit IgG		Invitrogen	PA5-104479
	C1QA	Mouse IgG1	1B10E3	Protientech	67063-1-1g
	HVEM	Rabbit IgG		Protientech	10138-1-AP
